# Supplementary material for: Experiments of the efficacy of tree ring blue intensity as a climate proxy in central and western China
Source: Copernicus journal article supplement (doi:10.5194/bg-20-3481-2023), 2023-08-21
Supplement: Supplementary file 1 [file bg-20-3481-2023-supplement.pdf]

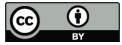

*Supplement of*

## **Experiments of the efficacy of tree ring blue intensity as a climate proxy in central and western China**

**Yonghong Zheng et al.**

*Correspondence to:* Rob Wilson ([rjsw@st-andrews.ac.uk](mailto:rjsw@st-andrews.ac.uk))

The copyright of individual parts of the supplement might differ from the article licence.

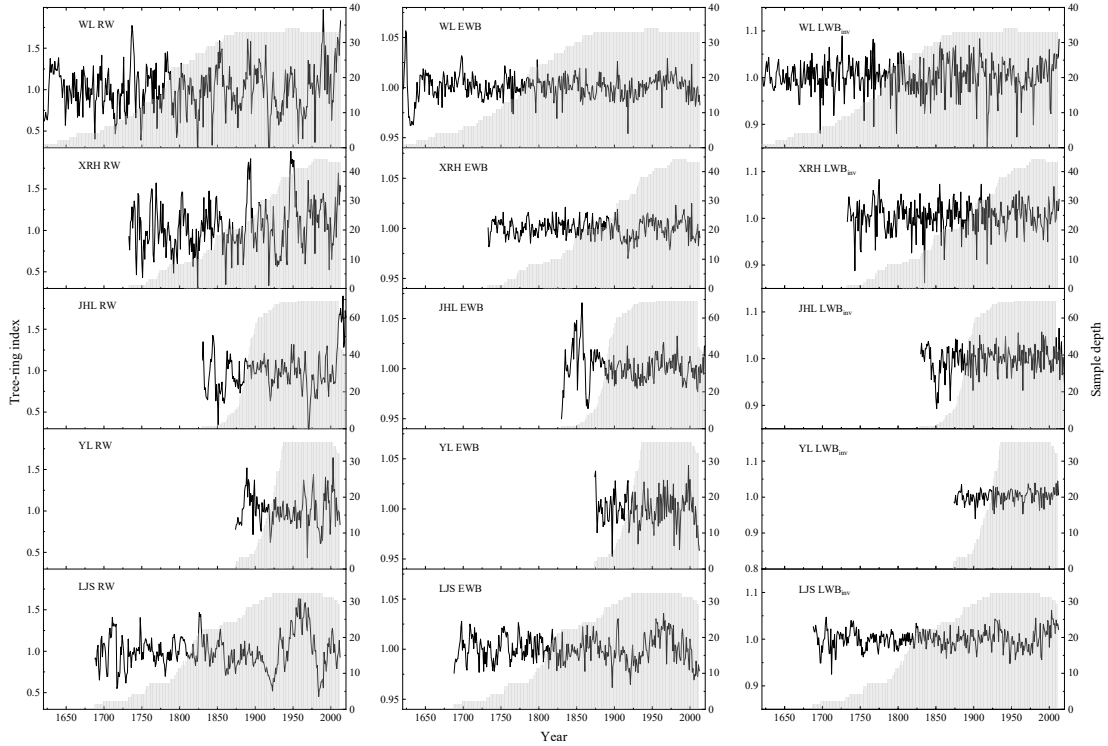

**Fig.S1 ADS detrended chronologies of RW, EWB, and LWB<sub>inv</sub>. Shading indicates sample depth.**

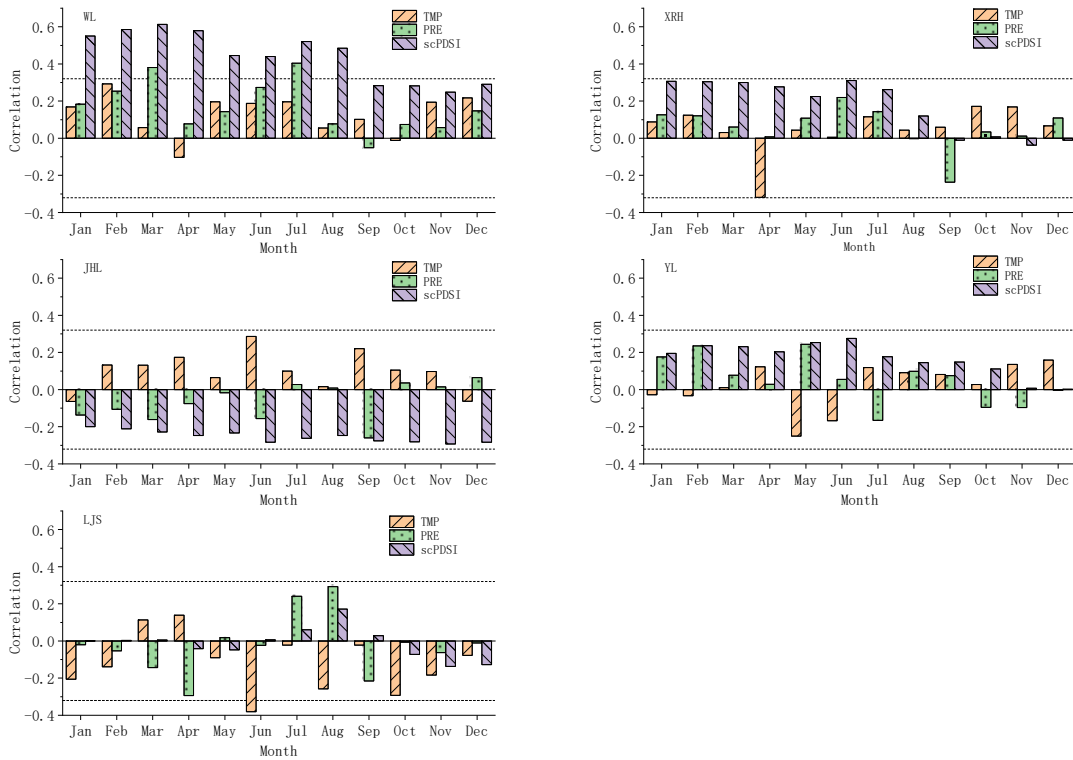

**Fig.S2 Correlation response function analysis (1951-2012) using RW chronologies with CRU TS4.05 mean temperatures, precipitation, and PDSI**

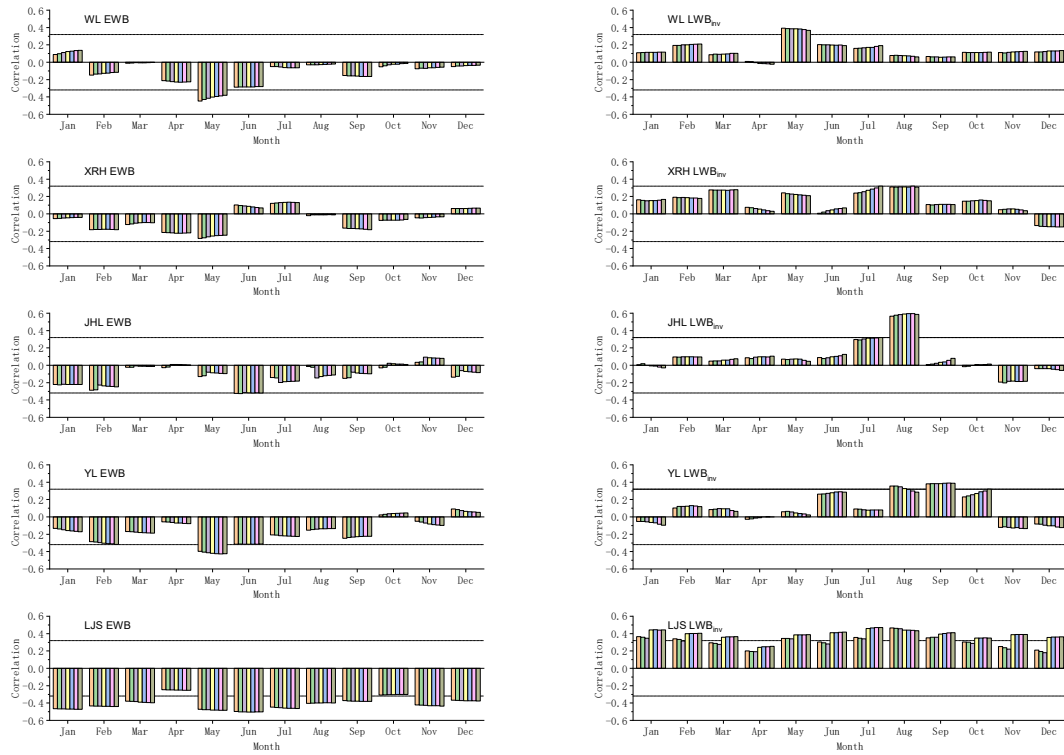

**Fig.S3 Correlation response function analysis (1951-2012) using monthly TMP with EWB and  $LWB_{inv}$ . The bars in each monthly group represent different percentile extraction ADS chronology variants, specifically P50:50, P60:40, P70:30, P80:20, P85:15, P90:10, and P95:5, respectively.**

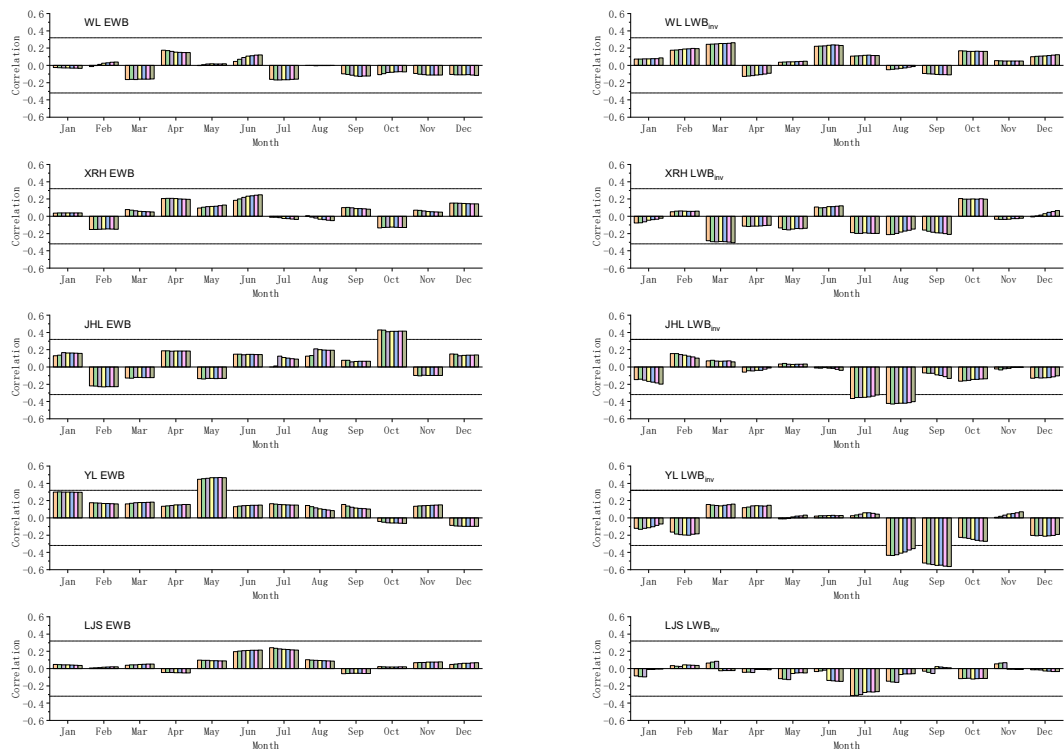

**Fig.S4 as Fig.S3, but correlations for PRE with EWB and  $LWB_{inv}$**

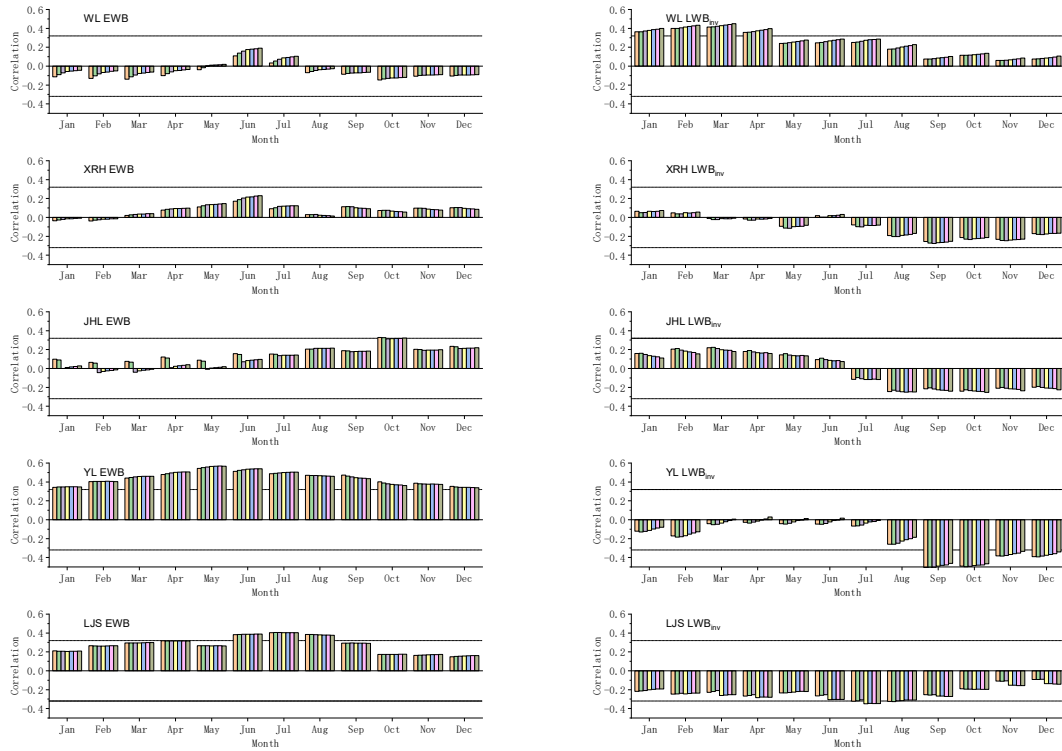

Fig.S5 as Fig.S3, but correlations for scPDSI with EWB and LWB<sub>inv</sub>

Table S1 CV, AC1, and Rbar for each ADS detrended chronology

| Site | Extraction | Parameter | CV    | AC1   | Rbar  |
|------|------------|-----------|-------|-------|-------|
| WL   | RW         | RW        | 0.536 | 0.642 | 0.516 |
| XRH  | RW         | RW        | 0.429 | 0.707 | 0.42  |
| JHL  | RW         | RW        | 0.636 | 0.7   | 0.376 |
| YL   | RW         | RW        | 0.470 | 0.606 | 0.241 |
| LJS  | RW         | RW        | 0.578 | 0.814 | 0.235 |
| WL   | P50:50     | EWB       | 0.056 | 0.425 | 0.161 |
| WL   | P60:40     | EWB       | 0.055 | 0.429 | 0.159 |
| WL   | P70:30     | EWB       | 0.054 | 0.435 | 0.156 |
| WL   | P80:20     | EWB       | 0.053 | 0.442 | 0.154 |
| WL   | P85:15     | EWB       | 0.053 | 0.447 | 0.154 |
| WL   | P90:10     | EWB       | 0.052 | 0.449 | 0.154 |
| WL   | P95:5      | EWB       | 0.052 | 0.451 | 0.154 |
| XRH  | P50:50     | EWB       | 0.070 | 0.329 | 0.09  |
| XRH  | P60:40     | EWB       | 0.069 | 0.330 | 0.089 |
| XRH  | P70:30     | EWB       | 0.068 | 0.334 | 0.088 |
| XRH  | P80:20     | EWB       | 0.067 | 0.332 | 0.088 |
| XRH  | P85:15     | EWB       | 0.067 | 0.331 | 0.089 |
| XRH  | P90:10     | EWB       | 0.066 | 0.329 | 0.088 |
| XRH  | P95:5      | EWB       | 0.066 | 0.327 | 0.089 |
| JHL  | P50:50     | EWB       | 0.055 | 0.628 | 0.088 |
| JHL  | P60:40     | EWB       | 0.056 | 0.625 | 0.089 |

|     |        |                    |       |       |       |
|-----|--------|--------------------|-------|-------|-------|
| JHL | P70:30 | EWB                | 0.062 | 0.574 | 0.097 |
| JHL | P80:20 | EWB                | 0.061 | 0.589 | 0.096 |
| JHL | P85:15 | EWB                | 0.060 | 0.592 | 0.096 |
| JHL | P90:10 | EWB                | 0.060 | 0.596 | 0.095 |
| JHL | P95:5  | EWB                | 0.059 | 0.597 | 0.095 |
| YL  | P50:50 | EWB                | 0.058 | 0.186 | 0.136 |
| YL  | P60:40 | EWB                | 0.058 | 0.190 | 0.137 |
| YL  | P70:30 | EWB                | 0.057 | 0.192 | 0.138 |
| YL  | P80:20 | EWB                | 0.057 | 0.198 | 0.139 |
| YL  | P85:15 | EWB                | 0.057 | 0.200 | 0.139 |
| YL  | P90:10 | EWB                | 0.057 | 0.202 | 0.139 |
| YL  | P95:5  | EWB                | 0.056 | 0.203 | 0.14  |
| LJS | P50:50 | EWB                | 0.084 | 0.522 | 0.099 |
| LJS | P60:40 | EWB                | 0.083 | 0.530 | 0.098 |
| LJS | P70:30 | EWB                | 0.083 | 0.531 | 0.098 |
| LJS | P80:20 | EWB                | 0.082 | 0.531 | 0.098 |
| LJS | P85:15 | EWB                | 0.081 | 0.532 | 0.098 |
| LJS | P90:10 | EWB                | 0.081 | 0.532 | 0.099 |
| LJS | P95:5  | EWB                | 0.080 | 0.534 | 0.099 |
| WL  | P50:50 | LWB <sub>inv</sub> | 0.082 | 0.336 | 0.301 |
| WL  | P60:40 | LWB <sub>inv</sub> | 0.081 | 0.336 | 0.303 |
| WL  | P70:30 | LWB <sub>inv</sub> | 0.081 | 0.337 | 0.306 |
| WL  | P80:20 | LWB <sub>inv</sub> | 0.080 | 0.339 | 0.308 |
| WL  | P85:15 | LWB <sub>inv</sub> | 0.080 | 0.34  | 0.308 |
| WL  | P90:10 | LWB <sub>inv</sub> | 0.079 | 0.342 | 0.307 |
| WL  | P95:5  | LWB <sub>inv</sub> | 0.077 | 0.345 | 0.304 |
| XRH | P50:50 | LWB <sub>inv</sub> | 0.070 | 0.448 | 0.097 |
| XRH | P60:40 | LWB <sub>inv</sub> | 0.070 | 0.444 | 0.096 |
| XRH | P70:30 | LWB <sub>inv</sub> | 0.070 | 0.441 | 0.094 |
| XRH | P80:20 | LWB <sub>inv</sub> | 0.069 | 0.44  | 0.091 |
| XRH | P85:15 | LWB <sub>inv</sub> | 0.068 | 0.44  | 0.089 |
| XRH | P90:10 | LWB <sub>inv</sub> | 0.068 | 0.438 | 0.087 |
| XRH | P95:5  | LWB <sub>inv</sub> | 0.067 | 0.435 | 0.085 |
| JHL | P50:50 | LWB <sub>inv</sub> | 0.058 | 0.367 | 0.185 |
| JHL | P60:40 | LWB <sub>inv</sub> | 0.058 | 0.364 | 0.186 |
| JHL | P70:30 | LWB <sub>inv</sub> | 0.057 | 0.362 | 0.188 |
| JHL | P80:20 | LWB <sub>inv</sub> | 0.056 | 0.359 | 0.188 |
| JHL | P85:15 | LWB <sub>inv</sub> | 0.055 | 0.359 | 0.188 |
| JHL | P90:10 | LWB <sub>inv</sub> | 0.055 | 0.357 | 0.187 |
| JHL | P95:5  | LWB <sub>inv</sub> | 0.054 | 0.355 | 0.186 |
| YL  | P50:50 | LWB <sub>inv</sub> | 0.044 | 0.328 | 0.191 |
| YL  | P60:40 | LWB <sub>inv</sub> | 0.043 | 0.34  | 0.188 |
| YL  | P70:30 | LWB <sub>inv</sub> | 0.043 | 0.333 | 0.191 |
| YL  | P80:20 | LWB <sub>inv</sub> | 0.042 | 0.326 | 0.193 |
| YL  | P85:15 | LWB <sub>inv</sub> | 0.041 | 0.32  | 0.194 |
| YL  | P90:10 | LWB <sub>inv</sub> | 0.041 | 0.316 | 0.193 |
| YL  | P95:5  | LWB <sub>inv</sub> | 0.040 | 0.306 | 0.189 |

|     |        |                    |       |       |       |
|-----|--------|--------------------|-------|-------|-------|
| LJS | P50:50 | LWB <sub>inv</sub> | 0.059 | 0.492 | 0.113 |
| LJS | P60:40 | LWB <sub>inv</sub> | 0.058 | 0.488 | 0.113 |
| LJS | P70:30 | LWB <sub>inv</sub> | 0.057 | 0.486 | 0.113 |
| LJS | P80:20 | LWB <sub>inv</sub> | 0.066 | 0.583 | 0.095 |
| LJS | P85:15 | LWB <sub>inv</sub> | 0.067 | 0.586 | 0.094 |
| LJS | P90:10 | LWB <sub>inv</sub> | 0.067 | 0.588 | 0.092 |
| LJS | P95:5  | LWB <sub>inv</sub> | 0.067 | 0.589 | 0.091 |

---

Note: Highest values highlighted using yellow shadow.
